# Supplementary material for: The large-scale organization of metabolic networks
Source: Springer Nature journal article supplement (doi:10.1038/35036627), 2000-10-01

## Supplementary material II

The attached graphs show the path length distribution  $\Pi(l)$  (see Fig. 3a in the manuscript) and the connectivity distribution  $P(k)$  (see Fig. 2 in the manuscript) for each of the 43 investigated organisms.

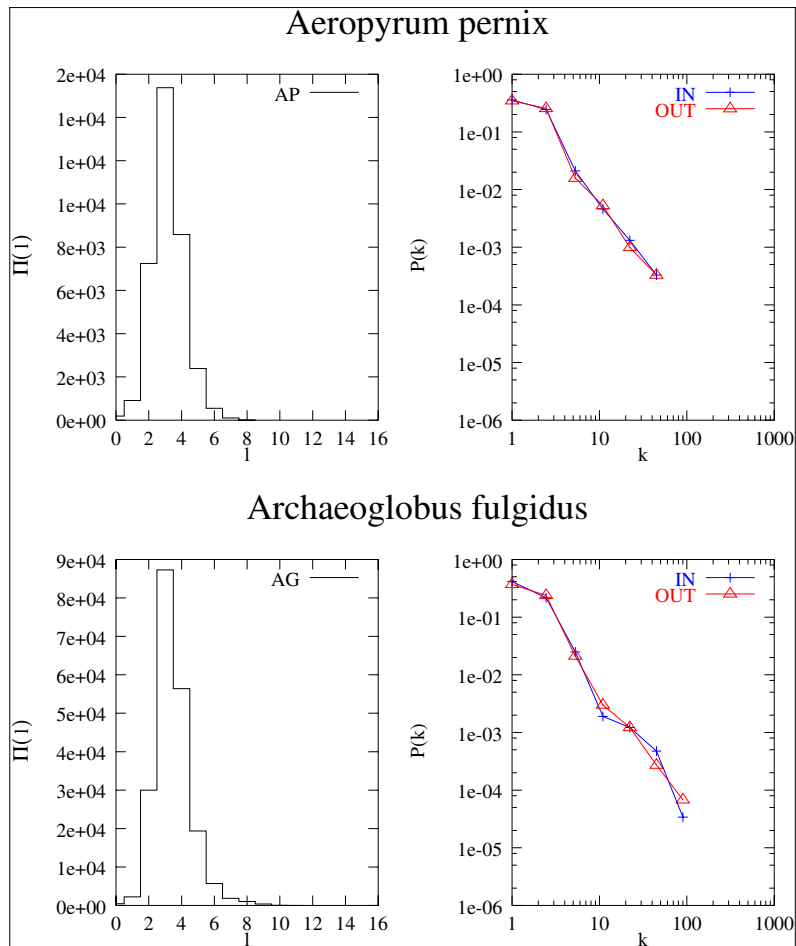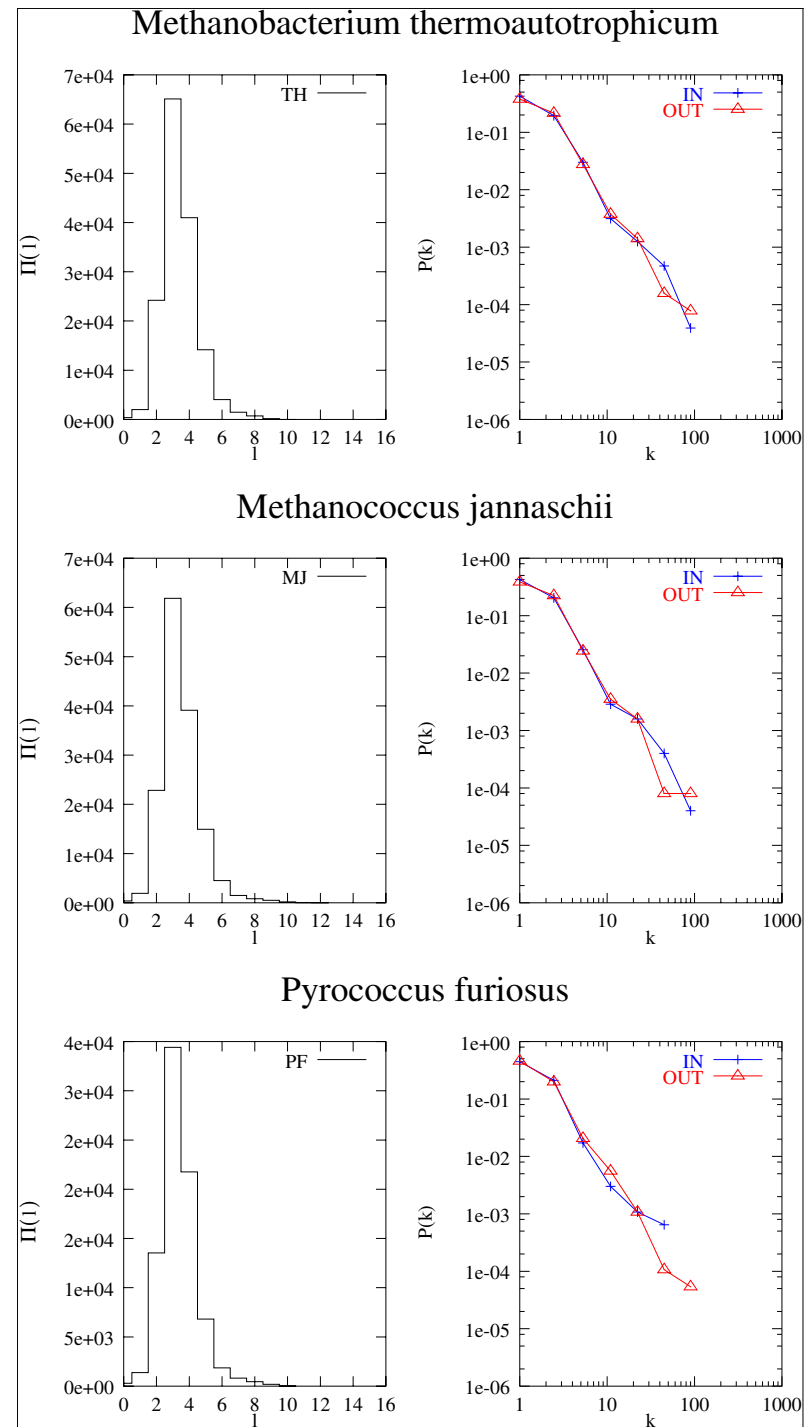

### *Pyrococcus horikoshii*

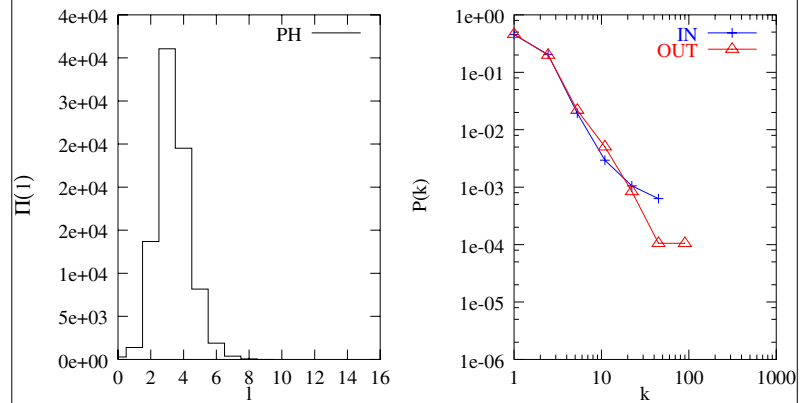

### *Chlamydia trachomatis*

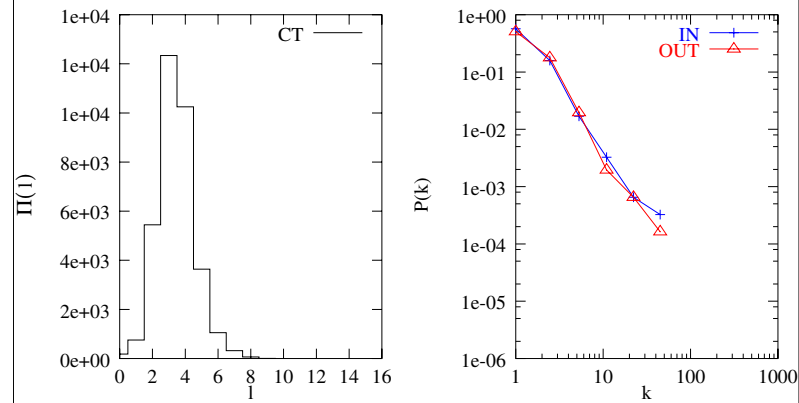

### *Aquifex aeolicus*

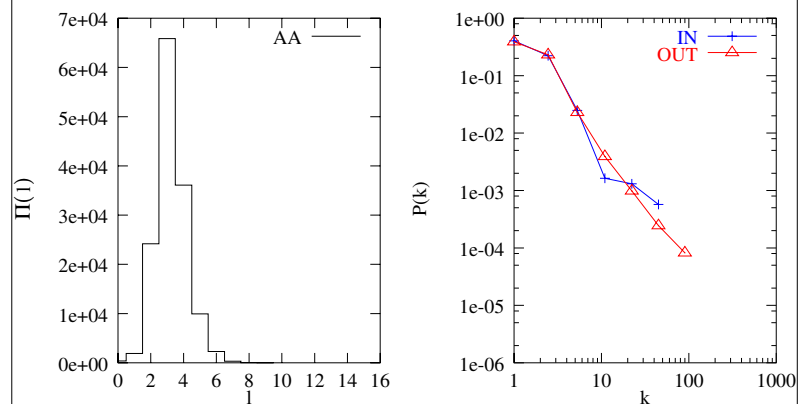

### *Synechocystis* sp.

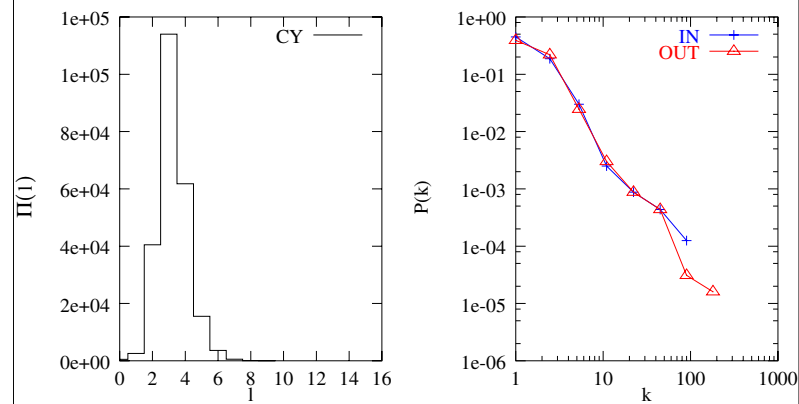

### *Chlamydia pneumoniae*

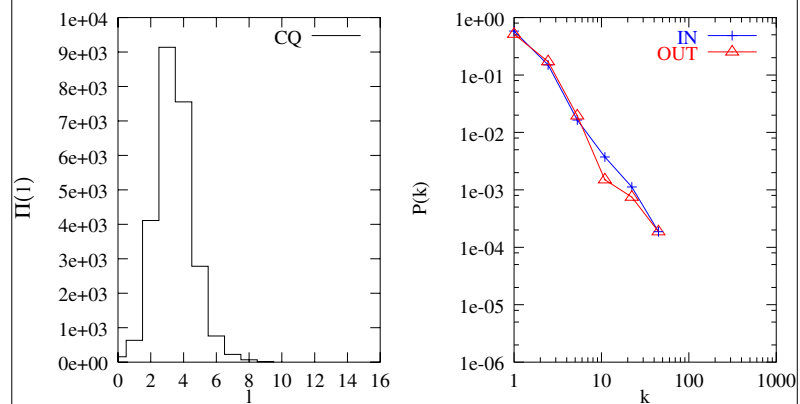

### *Porphyromonas gingivalis*

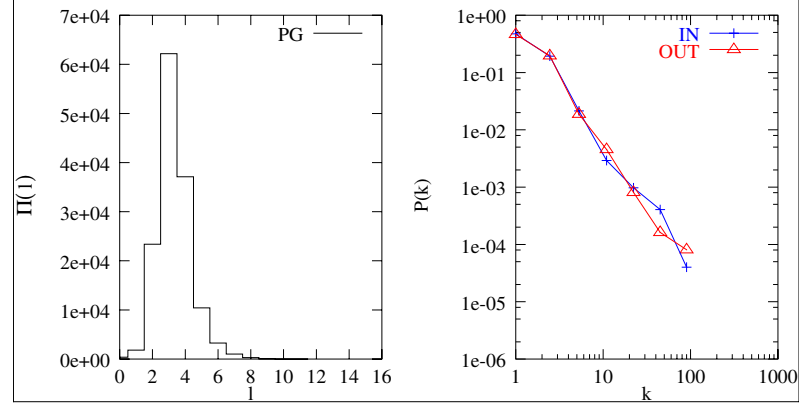

*Mycobacterium bovis*

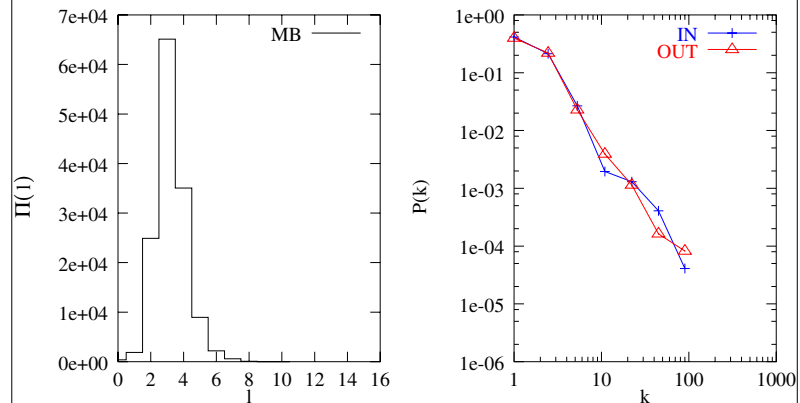

*Bacillus subtilis*

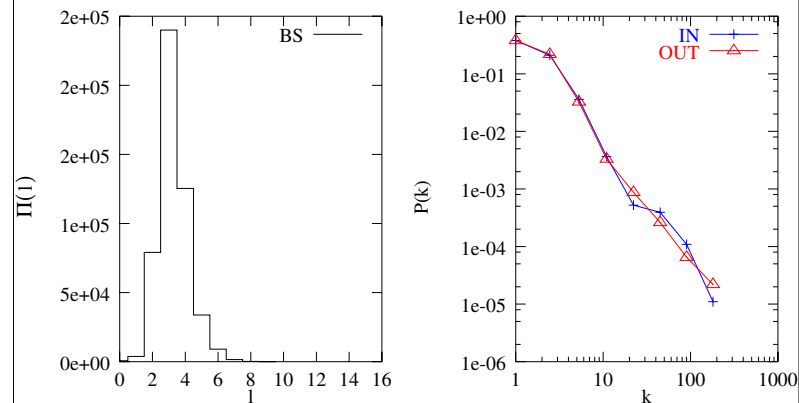

*Mycobacterium leprae*

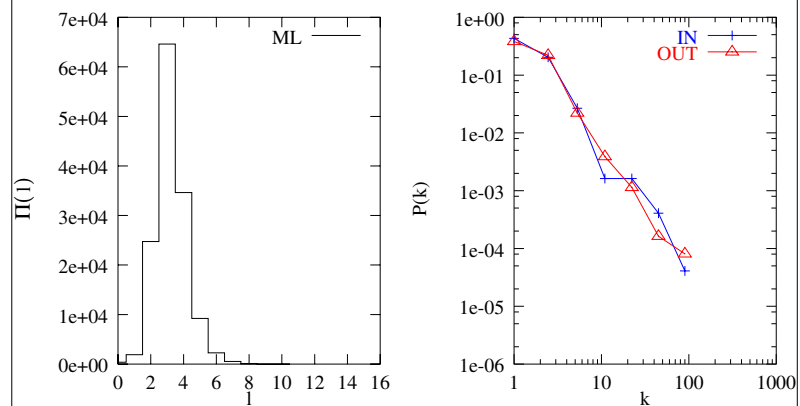

*Enterococcus faecalis*

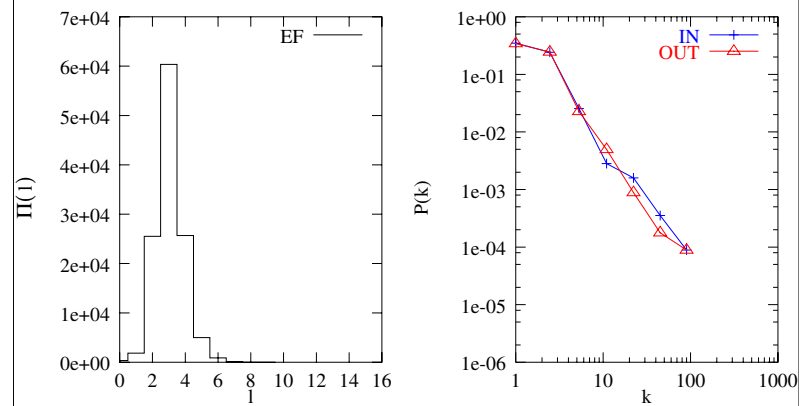

*Neisseria gonorrhoeae*

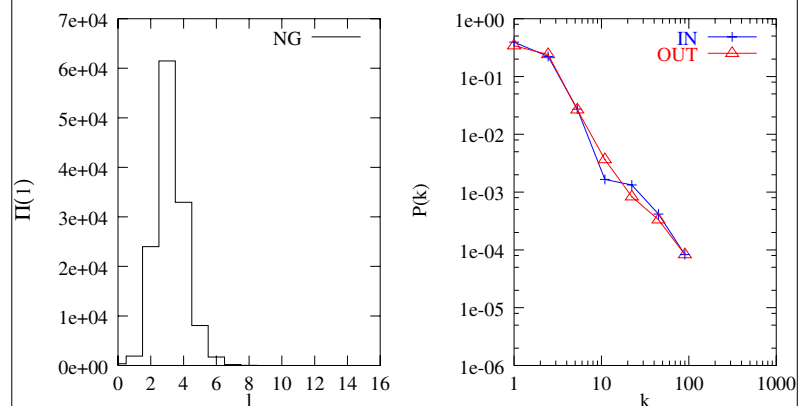

*Clostridium acetobutylicum*

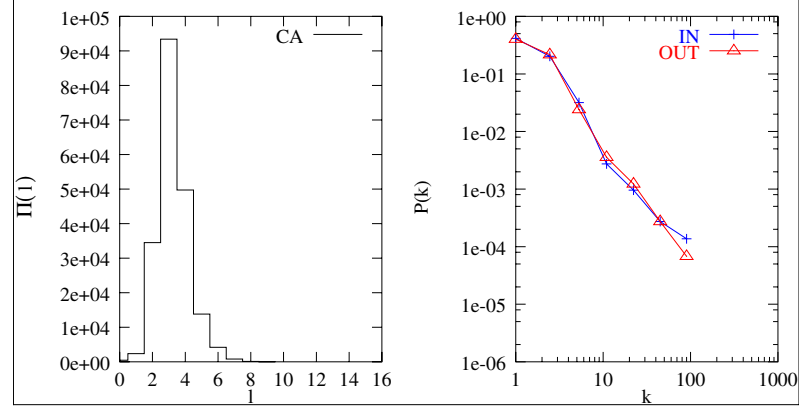

### Mycoplasma genitalium

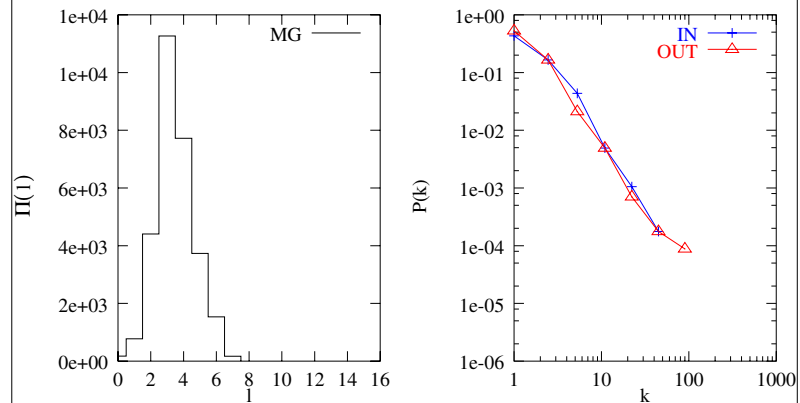

### Streptococcus pyogenes

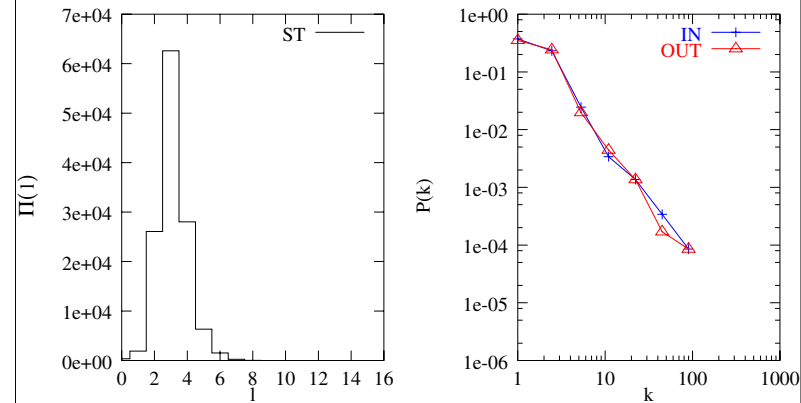

### Mycoplasma pneumoniae

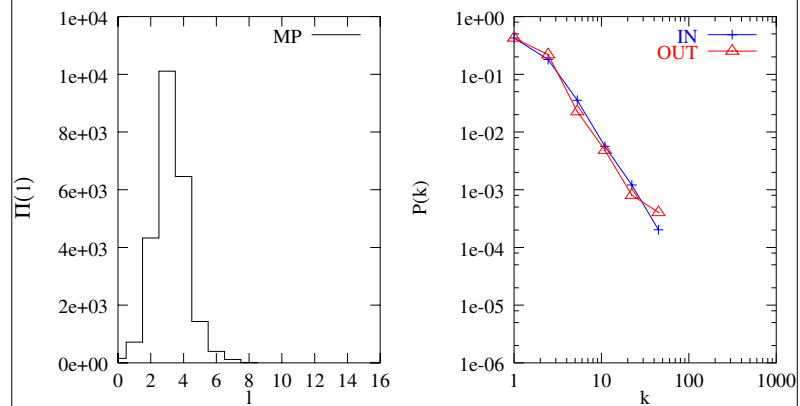

### Chlorobium tepidum

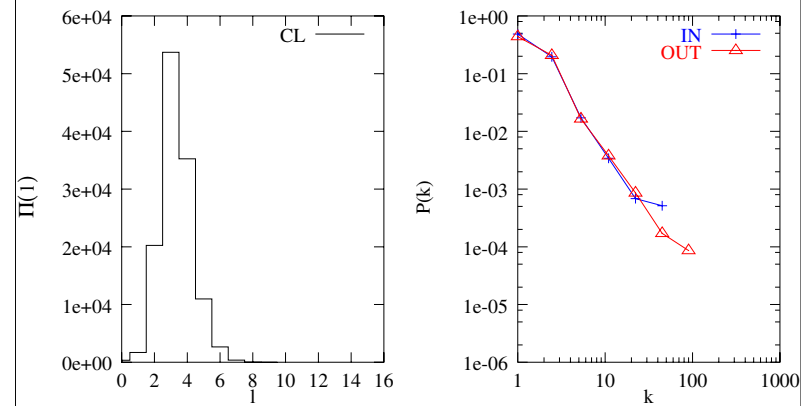

### Streptococcus pneumoniae

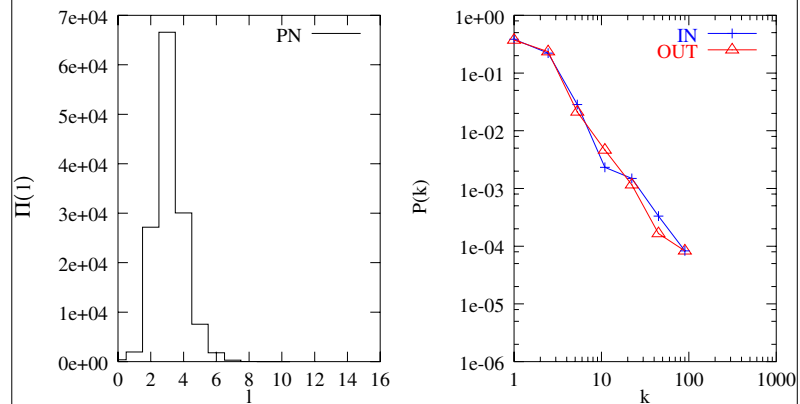

### Rhodobacter capsulatus

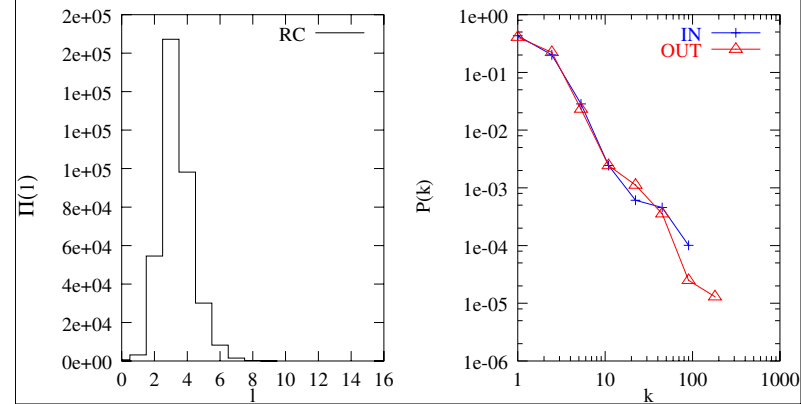

### *Rickettsia prowazekii*

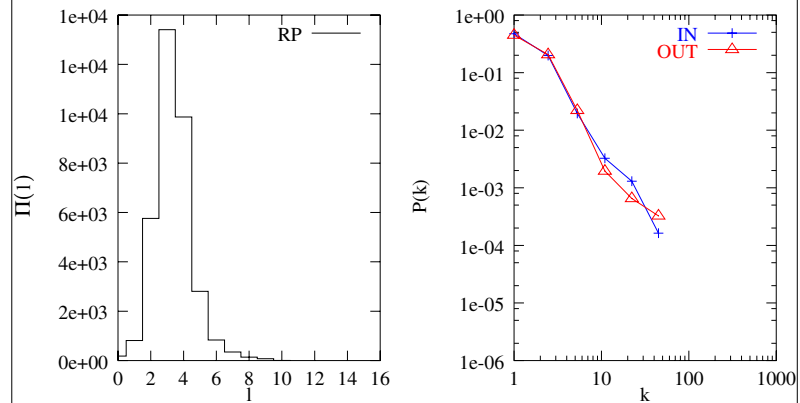

### *Campylobacter jejuni*

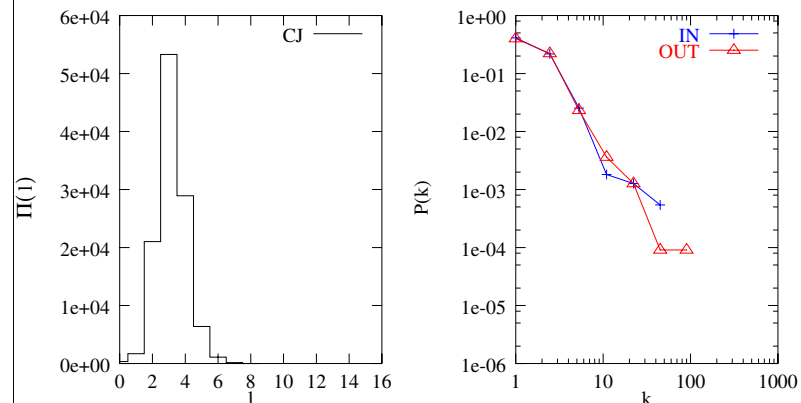

### *Neisseria gonorrhoeae*

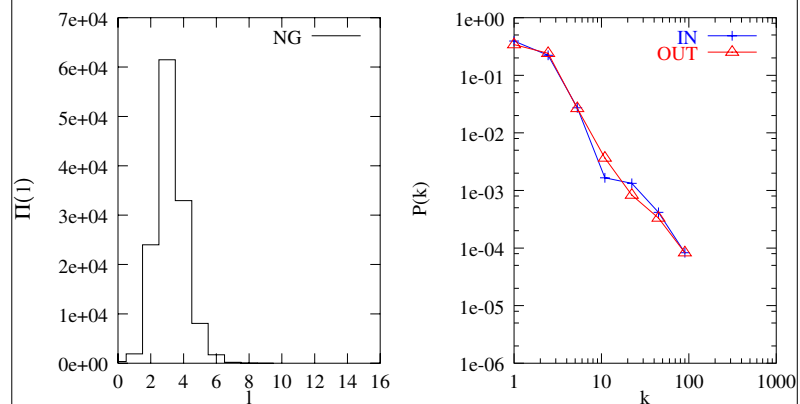

### *Helicobacter pylori*

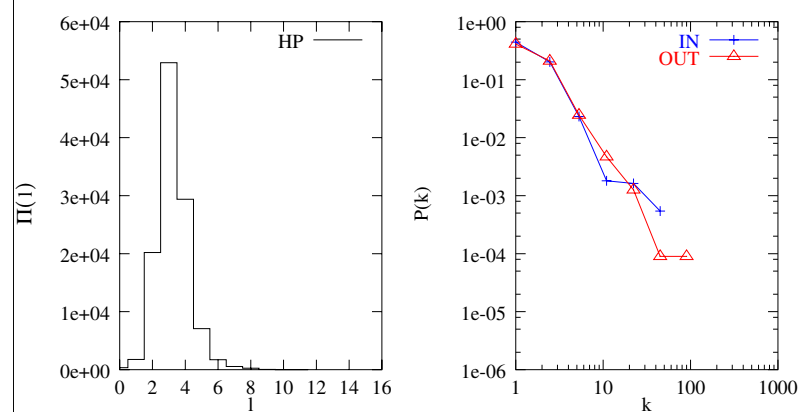

### *Neisseria meningitidis*

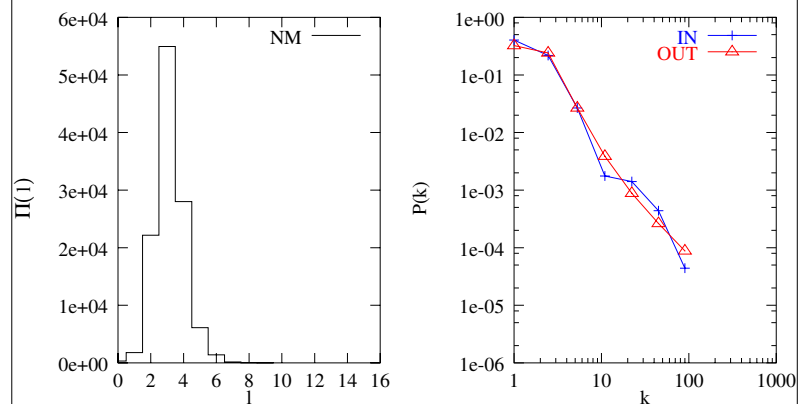

### *Escherichia coli*

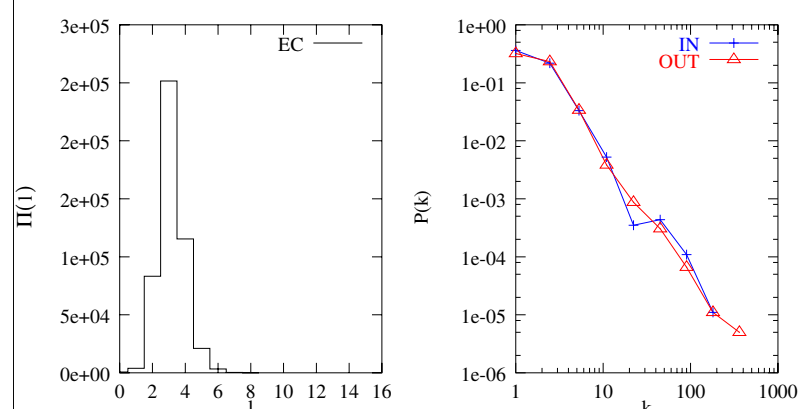

### Salmonella typhi

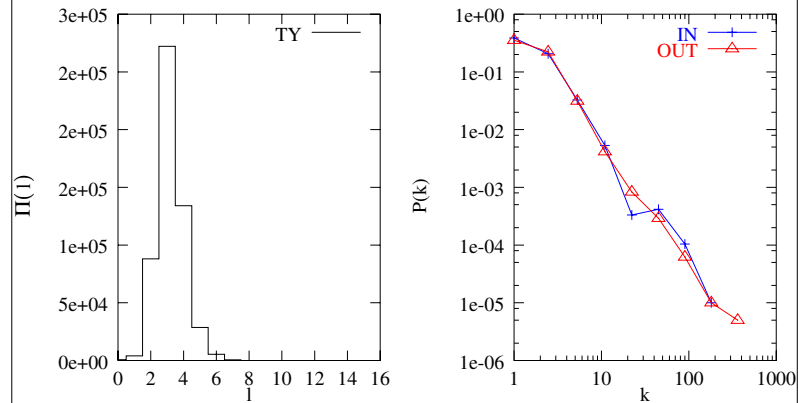

### Haemophilus influenzae

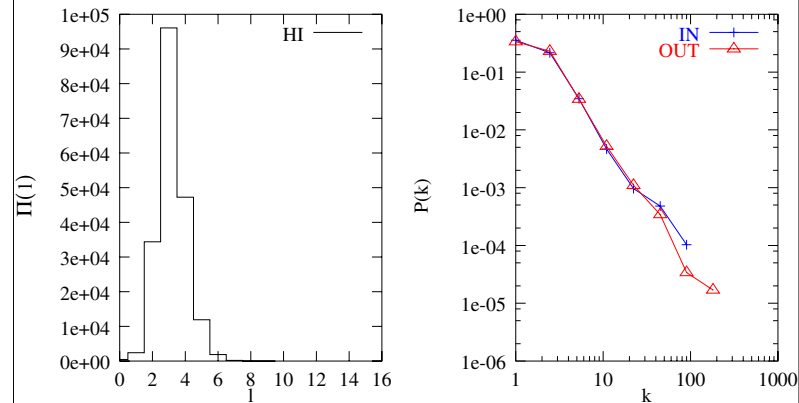

### Yersinia pestis

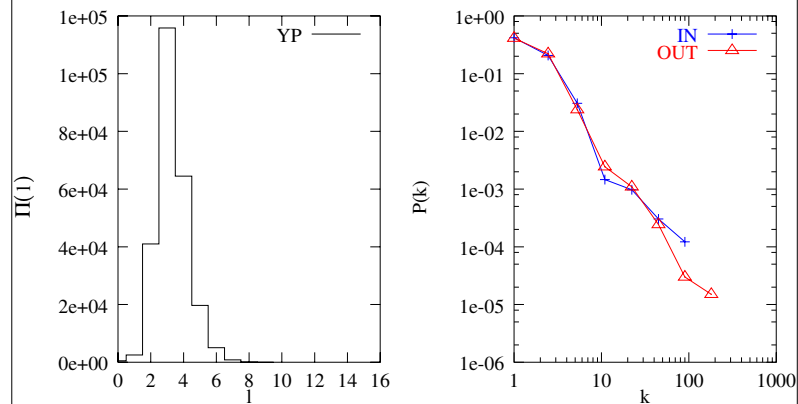

### Pseudomonas aeruginosa

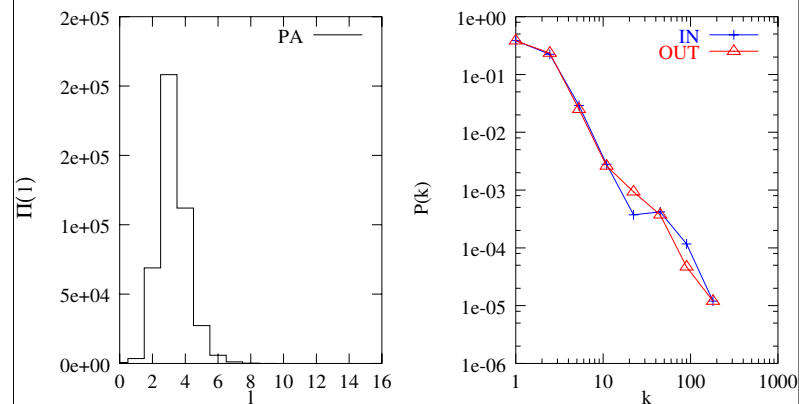

### Actinobacillus actinomycetemcomitans

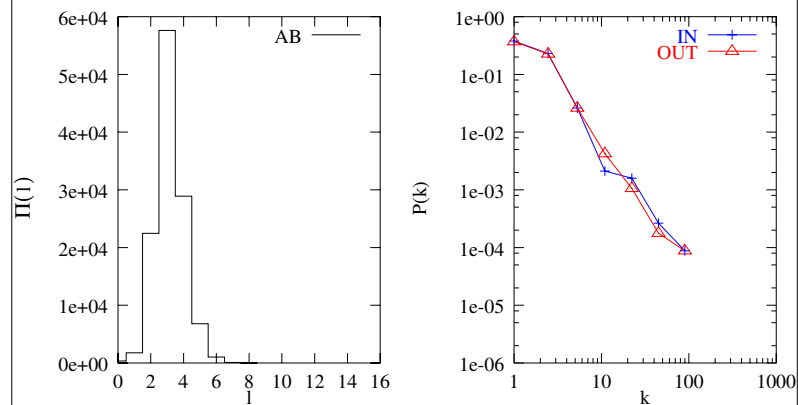

### Treponema pallidum

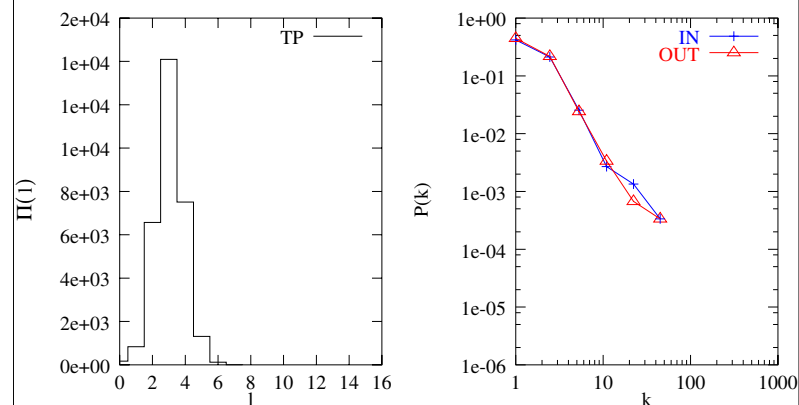

### *Borrelia burgdorferi*

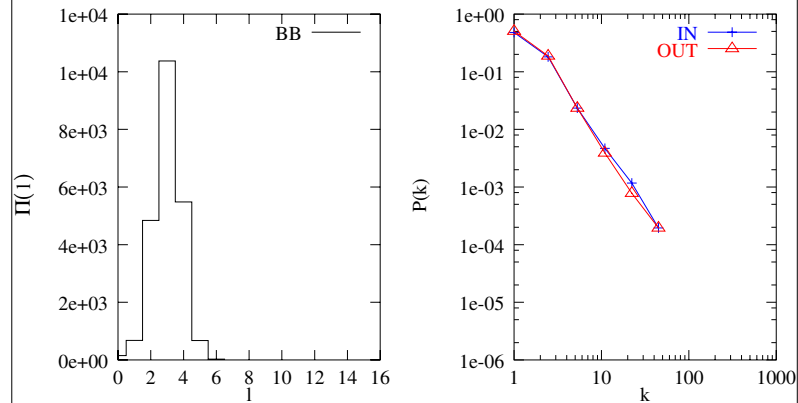

### *Emericella nidulans*

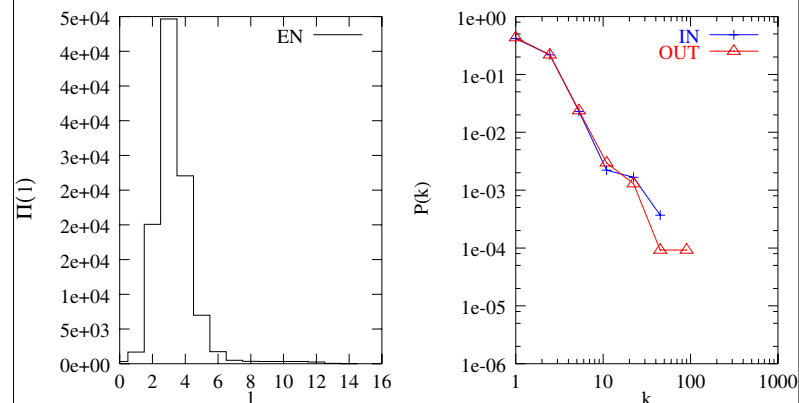

### *Thermotoga maritima*

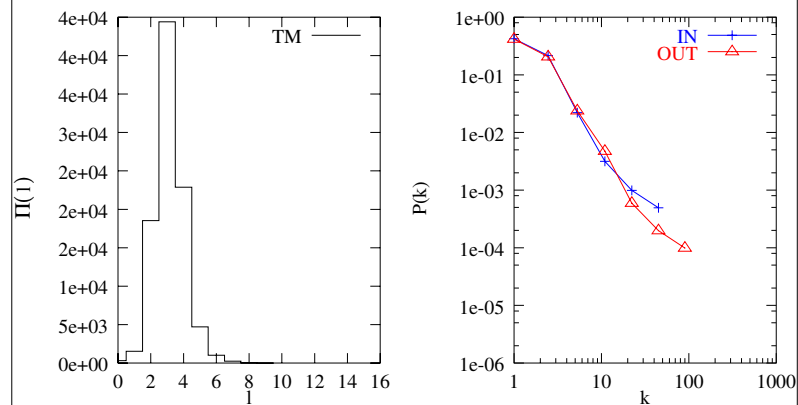

### *Saccharomyces cerevisiae*

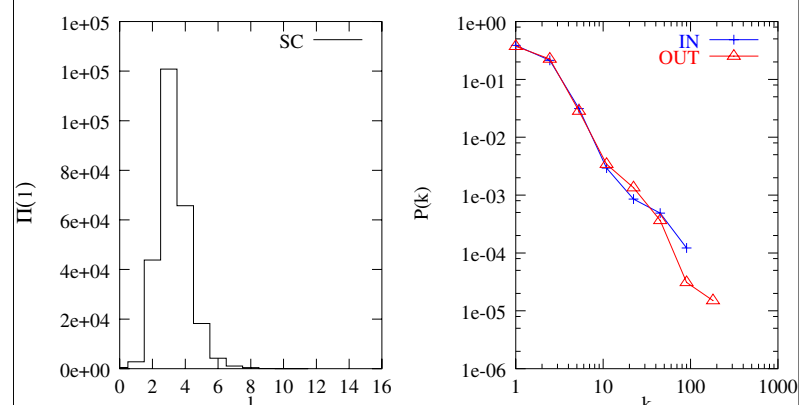

### *Deinococcus radiodurans*

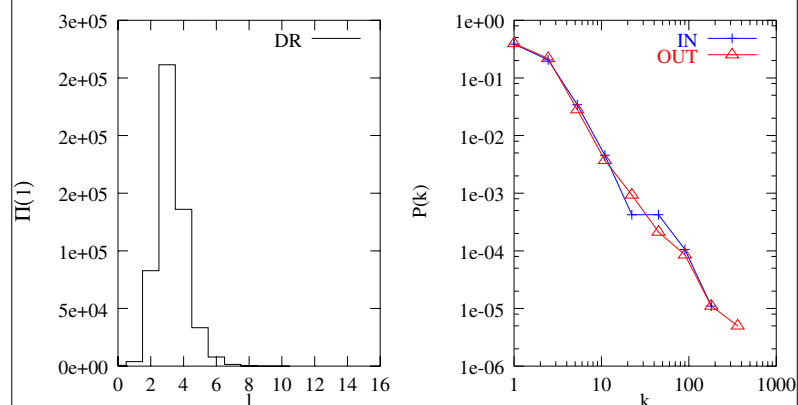

### *Caenorhabditis elegans*

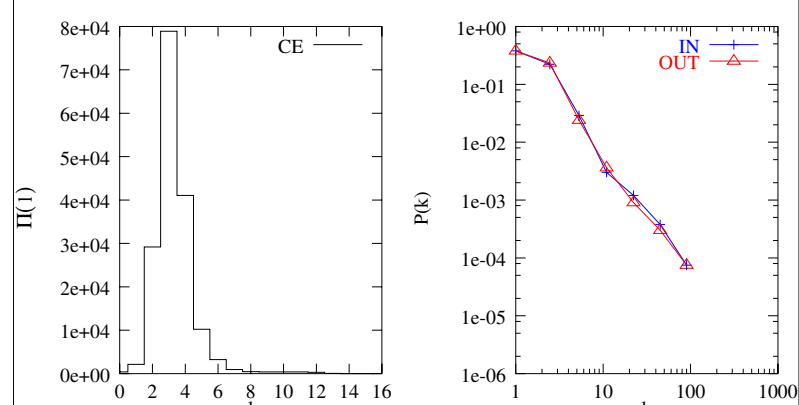

### Oryza sativa

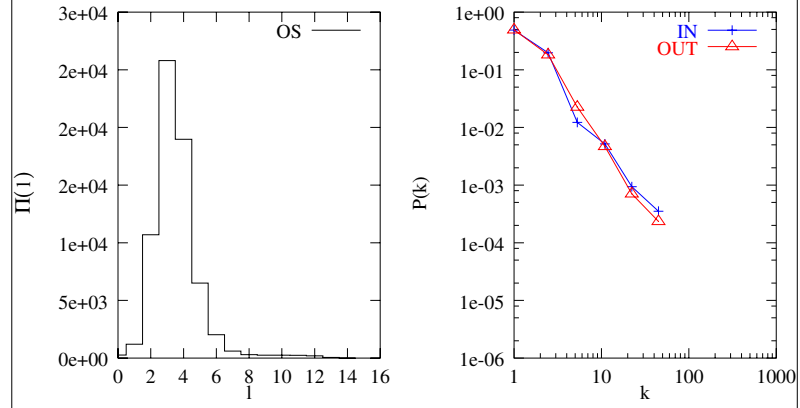

### Arabidopsis thaliana

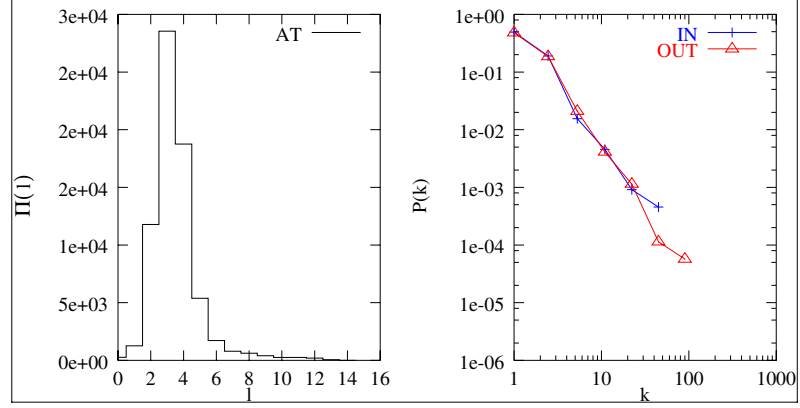

Supplement: 41586_2000_BF35036627_MOESM2_ESM.pdf [file 41586_2000_BF35036627_MOESM2_ESM.pdf]
