# Supplementary material for: The large-scale organization of metabolic networks
Source: Springer Nature journal article supplement (doi:10.1038/35036627), 2000-10-01
Supplement: 41586_2000_BF35036627_MOESM1_ESM.pdf [file 41586_2000_BF35036627_MOESM1_ESM.pdf]

## Supplementary material I

### Table 1.

Summary of the characteristics of the 43 investigated organisms. For each organism we show the number of substrate ( $N$ ), number of links ( $L$ ), number of individual reactions or temporary substrate-enzyme complexes ( $R$ ), number of enzymes ( $E$ ), the exponent  $\gamma_{in}$  and  $\gamma_{out}$  and the diameter of the metabolic network ( $D$ ). In the last two columns we list the ten substrates with the largest number of incoming (IN) and outgoing (OUT) links. The letters correspond to: a=H<sub>2</sub>O, b=ADP, c=orthophosphate, d=ATP, e=L-glutamate, f=NADP<sup>+</sup>, g=pyrophosphate, h=NAD<sup>+</sup>, i=NADPH, j=NADH, k=CO<sub>2</sub>, l=NH<sub>4</sub><sup>+</sup>, m=CoA, n=AMP, o=pyruvate, p=L-glutamine, q=2-oxoglutarate, r='alpha'-D-glucose 1-phosphate, s=phospho`enol`pyruvate, t=acetyl-CoA, u=H<sup>+</sup>, v=uridine, w=cytidine, x=UMP, y=CMP, z=glycerol,  $\alpha$ =D-fructose 6-phosphate. The color code of the fields denotes the different domains of life such a magenta = Archae green = Bacterium sky blue =Eukaryote.

| No. | Name                            | <i>N</i> | <i>L(IN)</i> | <i>L(OUT)</i> | <i>R</i> | <i>E</i> | $\gamma_{in}$ | $\gamma_{out}$ | <i>D</i> | Hub(IN)     | Hub(OUT)    |
|-----|---------------------------------|----------|--------------|---------------|----------|----------|---------------|----------------|----------|-------------|-------------|
| 1   | <i>A. pernix</i>                | 204      | 588          | 575           | 178      | 135      | 2.2           | 2.2            | 3.2      | bacdelgfij  | adbcegiqph  |
| 2   | <i>A. fulgidus</i>              | 496      | 1527         | 1484          | 486      | 299      | 2.2           | 2.2            | 3.5      | abcdghefjk  | adbijchemf  |
| 3   | <i>M. thermoautotrophicum</i>   | 430      | 1374         | 1331          | 428      | 280      | 2.2           | 2.2            | 3.4      | abcdgefkh   | adbicejfk   |
| 4   | <i>M. jannaschii</i>            | 424      | 1317         | 1272          | 415      | 264      | 2.2           | 2.3            | 3.5      | abcdgeknfh  | adbceijkhf  |
| 5   | <i>P. furiosus</i>              | 316      | 901          | 867           | 283      | 191      | 2.0           | 2.3            | 3.4      | abcdgeknfh  | dabceipjhf  |
| 6   | <i>P. horikoshii</i>            | 323      | 914          | 882           | 288      | 196      | 2.0           | 2.2            | 3.4      | abdcgefkn   | dabceipjhf  |
| 7   | <i>A. aeolicus</i>              | 419      | 1278         | 1249          | 401      | 285      | 2.1           | 2.2            | 3.3      | bcadgefkh   | adbceijgh   |
| 8   | <i>C. pneumoniae</i>            | 194      | 401          | 391           | 134      | 84       | 2.2           | 2.3            | 3.4      | bdcagfleri  | dabciergfp  |
| 9   | <i>C. trachomatis</i>           | 215      | 479          | 462           | 158      | 94       | 2.2           | 2.4            | 3.5      | bdacgelfrm  | dbaciegrfp  |
| 10  | <i>Synechocystis</i> sp.        | 546      | 1782         | 1746          | 570      | 370      | 2.0           | 2.2            | 3.3      | abcdgefghjk | adbicjehfg  |
| 11  | <i>P. gingivalis</i>            | 424      | 1192         | 1156          | 374      | 254      | 2.2           | 2.2            | 3.3      | abdcgefknh  | adbceipjhg  |
| 12  | <i>M. bovis</i>                 | 429      | 1247         | 1221          | 391      | 282      | 2.2           | 2.2            | 3.2      | abdcgefkm   | adbceifhj   |
| 13  | <i>M. leprae</i>                | 422      | 1271         | 1244          | 402      | 282      | 2.2           | 2.2            | 3.2      | abcdgefkm   | adbceifhj   |
| 14  | <i>M. tuberculosis</i>          | 587      | 1862         | 1823          | 589      | 358      | 2.0           | 2.2            | 3.3      | abdcghemjk  | adbjhmceit  |
| 15  | <i>B. subtilis</i>              | 785      | 2794         | 2741          | 916      | 516      | 2.2           | 2.1            | 3.3      | abdcjhmege  | adhbjcimef  |
| 16  | <i>E. faecalis</i>              | 386      | 1244         | 1218          | 382      | 281      | 2.1           | 2.2            | 3.1      | bdacgefik   | adbceifghj  |
| 17  | <i>C. acetobutylicum</i>        | 494      | 1624         | 1578          | 511      | 344      | 2.1           | 2.2            | 3.3      | abcdgefhlk  | adbceijhfo  |
| 18  | <i>M. genitalium</i>            | 209      | 535          | 525           | 196      | 85       | 2.4           | 2.2            | 3.5      | bdcgzxuyos  | adbcbguvwos |
| 19  | <i>M. pneumoniae</i>            | 178      | 470          | 466           | 154      | 88       | 2.3           | 2.2            | 3.2      | bcdgxoyasl  | dabcbgowvwr |
| 20  | <i>S. pneumoniae</i>            | 416      | 1331         | 1298          | 412      | 288      | 2.1           | 2.2            | 3.2      | abdcgefno   | adbceifghj  |
| 21  | <i>S. pyogenes</i>              | 403      | 1300         | 1277          | 404      | 280      | 2.1           | 2.2            | 3.1      | abdcefoln   | adbceifohg  |
| 22  | <i>C. tepidum</i>               | 389      | 1097         | 1062          | 333      | 231      | 2.1           | 2.2            | 3.3      | badcgenfki  | dabceipgq   |
| 23  | <i>R. capsulatus</i>            | 670      | 2174         | 2122          | 711      | 427      | 2.1           | 2.2            | 3.4      | abcdhgefjk  | adbjhcimet  |
| 24  | <i>R. prowazekii</i>            | 214      | 510          | 504           | 155      | 100      | 2.3           | 2.3            | 3.4      | bdacgefilm  | dabicfemgt  |
| 25  | <i>N. gonorrhoeae</i>           | 406      | 1298         | 1270          | 413      | 285      | 2.1           | 2.2            | 3.2      | abdcgefjk   | adbiechfjg  |
| 26  | <i>N. meningitidis</i>          | 381      | 1212         | 1181          | 380      | 271      | 2.2           | 2.2            | 3.2      | abdcegfkl   | adbceifhfg  |
| 27  | <i>C. jejuni</i>                | 380      | 1142         | 1115          | 359      | 254      | 2.1           | 2.3            | 3.2      | abdcegfkih  | adbceifghj  |
| 28  | <i>H. pylori</i>                | 375      | 1181         | 1144          | 375      | 246      | 2.0           | 2.3            | 3.3      | abcdgefhnk  | dabciejfhp  |
| 29  | <i>E. coli</i>                  | 778      | 2904         | 2859          | 968      | 570      | 2.2           | 2.1            | 3.2      | abcdhjemlf  | adhjbciefm  |
| 30  | <i>S. typhi</i>                 | 819      | 3008         | 2951          | 1007     | 577      | 2.2           | 2.2            | 3.2      | abcdhjefgm  | adhjbciefm  |
| 31  | <i>Y. pestis</i>                | 568      | 1754         | 1715          | 580      | 386      | 2.1           | 2.2            | 3.3      | abdcgeklfh  | adbceihjfl  |
| 32  | <i>A. actinomycetemcomitans</i> | 395      | 1202         | 1166          | 380      | 271      | 2.1           | 2.2            | 3.2      | bacdfefikl  | adbceifhfg  |
| 33  | <i>H. influenzae</i>            | 526      | 1773         | 1746          | 597      | 361      | 2.1           | 2.3            | 3.2      | abcdgefjhm  | adbchiefju  |
| 34  | <i>P. aeruginosa</i>            | 734      | 2453         | 2398          | 799      | 490      | 2.1           | 2.2            | 3.3      | abdchjkgef  | adjhbimcef  |
| 35  | <i>T. pallidum</i>              | 207      | 562          | 555           | 175      | 124      | 2.2           | 2.3            | 3.1      | bdcgaelfnh  | dabcegiplf  |
| 36  | <i>B. burgdorferi</i>           | 187      | 442          | 438           | 140      | 106      | 2.3           | 2.4            | 3.0      | bdgcaelfn   | dabcgifeal  |
| 37  | <i>T. maritima</i>              | 338      | 1004         | 976           | 302      | 223      | 2.1           | 2.2            | 3.2      | badcegfikn  | dabceifgqh  |
| 38  | <i>D. radiodurans</i>           | 815      | 2870         | 2811          | 965      | 557      | 2.2           | 2.1            | 3.3      | acbdhjgk    | adhbjcimef  |
| 39  | <i>E. nidulans</i>              | 383      | 1095         | 1081          | 339      | 254      | 2.1           | 2.2            | 3.3      | abdceghfl   | adbceifeiq  |
| 40  | <i>S. cerevisiae</i>            | 561      | 1934         | 1889          | 596      | 402      | 2.0           | 2.2            | 3.3      | abdcehgk    | adbhceifeim |
| 41  | <i>C. elegans</i>               | 462      | 1446         | 1418          | 450      | 295      | 2.1           | 2.2            | 3.3      | abdcjhelgk  | adbhceifeim |
| 42  | <i>O. sativa</i>                | 292      | 763          | 751           | 238      | 178      | 2.1           | 2.3            | 3.5      | badcegljkn  | adbcehijfn  |
| 43  | <i>A. thaliana</i>              | 302      | 804          | 789           | 250      | 185      | 2.1           | 2.3            | 3.5      | badceghlk   | adbcehijgn  |
